# Supplementary material for: Process Optimization of Waste Activated Sludge in Anaerobic Digestion and Biogas Production by Electrochemical Pre-Treatment Using Ruthenium Oxide Coated Titanium Electrodes
Source: MDPI journal article supplement (doi:10.3390/su13094874), 2021-04-27
Supplement: s1 [file s1]

**Table S1.** ANOVA for MLVSS removal (Y1) quadratic model.

| Source                 | Sum of Squares | df | Mean Square | F-value | p-value  |             |
|------------------------|----------------|----|-------------|---------|----------|-------------|
| Model                  | 2187.31        | 14 | 156.24      | 7.56    | 0.0002   | significant |
| A-pH                   | 1552.26        | 1  | 1552.26     | 75.15   | < 0.0001 |             |
| B-Sludge concentration | 382.81         | 1  | 382.81      | 18.53   | 0.0006   |             |
| C-Electrolysis time    | 31.92          | 1  | 31.92       | 1.55    | 0.2329   |             |
| D-Current density      | 3.27           | 1  | 3.27        | 0.1584  | 0.6962   |             |
| AB                     | 25.83          | 1  | 25.83       | 1.25    | 0.2811   |             |
| AC                     | 6.5            | 1  | 6.5         | 0.3148  | 0.583    |             |
| AD                     | 0.0731         | 1  | 0.0731      | 0.0035  | 0.9533   |             |
| BC                     | 1.48           | 1  | 1.48        | 0.0715  | 0.7928   |             |
| BD                     | 0.4616         | 1  | 0.4616      | 0.0223  | 0.8832   |             |
| CD                     | 3.78           | 1  | 3.78        | 0.1829  | 0.6749   |             |
| A <sup>2</sup>         | 108.76         | 1  | 108.76      | 5.27    | 0.0366   |             |
| B <sup>2</sup>         | 5.19           | 1  | 5.19        | 0.2514  | 0.6233   |             |
| C <sup>2</sup>         | 28.57          | 1  | 28.57       | 1.38    | 0.2579   |             |
| D <sup>2</sup>         | 15.37          | 1  | 15.37       | 0.7442  | 0.4019   |             |
| Residual               | 309.84         | 15 | 20.66       |         |          |             |
| Lack of Fit            | 293.66         | 10 | 29.37       | 9.08    | 0.0126   | significant |
| Pure Error             | 16.17          | 5  | 3.23        |         |          |             |
| Cor Total              | 2497.15        | 29 |             |         |          |             |

**Table S2.** ANOVA for CST reduction (Y2) quadratic model.

| Source                 | Sum of Squares | df | Mean Square | F-value | p-value  |             |
|------------------------|----------------|----|-------------|---------|----------|-------------|
| Model                  | 7839.22        | 14 | 559.94      | 8.39    | < 0.0001 | significant |
| A-pH                   | 2083.88        | 1  | 2083.88     | 31.21   | < 0.0001 |             |
| B-Sludge concentration | 373.41         | 1  | 373.41      | 5.59    | 0.0319   |             |
| C-Electrolysis time    | 38.26          | 1  | 38.26       | 0.5731  | 0.4608   |             |
| D-Current density      | 1.53           | 1  | 1.53        | 0.0229  | 0.8817   |             |
| AB                     | 211.57         | 1  | 211.57      | 3.17    | 0.0953   |             |
| AC                     | 0.8264         | 1  | 0.8264      | 0.0124  | 0.9129   |             |
| AD                     | 7.44           | 1  | 7.44        | 0.1114  | 0.7432   |             |
| BC                     | 0.2066         | 1  | 0.2066      | 0.0031  | 0.9564   |             |
| BD                     | 1.86           | 1  | 1.86        | 0.0279  | 0.8697   |             |
| CD                     | 1.86           | 1  | 1.86        | 0.0279  | 0.8697   |             |
| A <sup>2</sup>         | 3924.7         | 1  | 3924.7      | 58.78   | < 0.0001 |             |
| B <sup>2</sup>         | 277.53         | 1  | 277.53      | 4.16    | 0.0595   |             |
| C <sup>2</sup>         | 0.0897         | 1  | 0.0897      | 0.0013  | 0.9712   |             |
| D <sup>2</sup>         | 273.39         | 1  | 273.39      | 4.09    | 0.0612   |             |
| Residual               | 1001.52        | 15 | 66.77       |         |          |             |
| Lack of Fit            | 964.48         | 10 | 96.45       | 13.02   | 0.0055   | significant |
| Pure Error             | 37.04          | 5  | 7.41        |         |          |             |
| Cor Total              | 8840.74        | 29 |             |         |          |             |

**Table S3.** ANOVA for sCOD (Y3) quadratic model.

| Source                 | Sum of Squares        | df | Mean Square          | F-value | p-value  |             |
|------------------------|-----------------------|----|----------------------|---------|----------|-------------|
| Model                  | 1.35×10 <sup>8</sup>  | 14 | 9.67×10 <sup>6</sup> | 9.81    | < 0.0001 | significant |
| A-pH                   | 9.86×10 <sup>7</sup>  | 1  | 9.86×10 <sup>7</sup> | 99.95   | < 0.0001 |             |
| B-Sludge concentration | 6.74×10 <sup>6</sup>  | 1  | 6.74×10 <sup>6</sup> | 6.83    | 0.0195   |             |
| C-Electrolysis time    | 5.18×10 <sup>6</sup>  | 1  | 5.18×10 <sup>6</sup> | 5.26    | 0.0368   |             |
| D-Current density      | 87,640.42             | 1  | 87,640.42            | 0.0889  | 0.7697   |             |
| AB                     | 1.10×10 <sup>7</sup>  | 1  | 1.10×10 <sup>7</sup> | 11.16   | 0.0045   |             |
| AC                     | 94,787.02             | 1  | 94,787.02            | 0.0961  | 0.7608   |             |
| AD                     | 71435.93              | 1  | 71,435.93            | 0.0725  | 0.7915   |             |
| BC                     | 1.37×10 <sup>5</sup>  | 1  | 1.37×10 <sup>5</sup> | 0.1384  | 0.7151   |             |
| BD                     | 34,456.64             | 1  | 34,456.64            | 0.0349  | 0.8542   |             |
| CD                     | 1.36×10 <sup>5</sup>  | 1  | 1.36×10 <sup>5</sup> | 0.1382  | 0.7153   |             |
| A <sup>2</sup>         | 3.66×10 <sup>5</sup>  | 1  | 3.66×10 <sup>5</sup> | 0.3709  | 0.5516   |             |
| B <sup>2</sup>         | 6.58×10 <sup>6</sup>  | 1  | 6.58×10 <sup>6</sup> | 6.67    | 0.0208   |             |
| C <sup>2</sup>         | 1.73×10 <sup>6</sup>  | 1  | 1.73×10 <sup>6</sup> | 1.75    | 0.2055   |             |
| D <sup>2</sup>         | 2.946×10 <sup>6</sup> | 1  | 2.94×10 <sup>6</sup> | 2.98    | 0.1048   |             |
| Residual               | 1.48×10 <sup>7</sup>  | 15 | 9.86×10 <sup>5</sup> |         |          |             |
| Lack of Fit            | 1.42×10 <sup>7</sup>  | 10 | 1.42×10 <sup>6</sup> | 12.68   | 0.0059   | significant |
| Pure Error             | 5.61×10 <sup>5</sup>  | 5  | 1.12×10 <sup>5</sup> |         |          |             |
| Cor Total              | 1.50×10 <sup>8</sup>  | 29 |                      |         |          |             |

**Table S4.** ANOVA for EPS (Y4) quadratic model.

| Source                 | Sum of Squares       | df | Mean Square          | F-value | p-value  |                 |
|------------------------|----------------------|----|----------------------|---------|----------|-----------------|
| Model                  | 4.49×10 <sup>5</sup> | 14 | 32,083.56            | 12.3    | < 0.0001 | significant     |
| A-pH                   | 2.29×10 <sup>5</sup> | 1  | 2.29×10 <sup>5</sup> | 87.74   | < 0.0001 |                 |
| B-Sludge concentration | 47,582.83            | 1  | 47,582.83            | 18.24   | 0.0007   |                 |
| C-Electrolysis time    | 22,293.59            | 1  | 22,293.59            | 8.55    | 0.0105   |                 |
| D-Current density      | 2025.87              | 1  | 2025.87              | 0.7765  | 0.3921   |                 |
| AB                     | 28,642.1             | 1  | 28,642.1             | 10.98   | 0.0047   |                 |
| AC                     | 692.49               | 1  | 692.49               | 0.2654  | 0.6139   |                 |
| AD                     | 35.7                 | 1  | 35.7                 | 0.0137  | 0.9084   |                 |
| BC                     | 14,210.63            | 1  | 14,210.63            | 5.45    | 0.0339   |                 |
| BD                     | 399.98               | 1  | 399.98               | 0.1533  | 0.7009   |                 |
| CD                     | 128.15               | 1  | 128.15               | 0.0491  | 0.8276   |                 |
| A <sup>2</sup>         | 74,459.71            | 1  | 74,459.71            | 28.54   | < 0.0001 |                 |
| B <sup>2</sup>         | 456.72               | 1  | 456.72               | 0.1751  | 0.6816   |                 |
| C <sup>2</sup>         | 15,630.04            | 1  | 15,630.04            | 5.99    | 0.0272   |                 |
| D <sup>2</sup>         | 7288.86              | 1  | 7288.86              | 2.79    | 0.1154   |                 |
| Residual               | 39,133.27            | 15 | 2608.88              |         |          |                 |
| Lack of Fit            | 34,119.21            | 10 | 3411.92              | 3.4     | 0.0944   | not significant |
| Pure Error             | 5014.06              | 5  | 1002.81              |         |          |                 |
| Cor Total              | 4.88×10 <sup>5</sup> | 29 |                      |         |          |                 |
